# Supplementary material for: What you see and what you are told: an action-specific effect that is unaffected by explicit feedback
Source: Springer Nature journal article supplement (doi:10.1007/s00426-017-0848-8), 2017-03-02

Fitted data across all participants

Experiment 1: each plot shows data for subject and phase (see title of each plot) and paddle size (black = small paddle; red = big paddle). Curves represent logistic regressions.


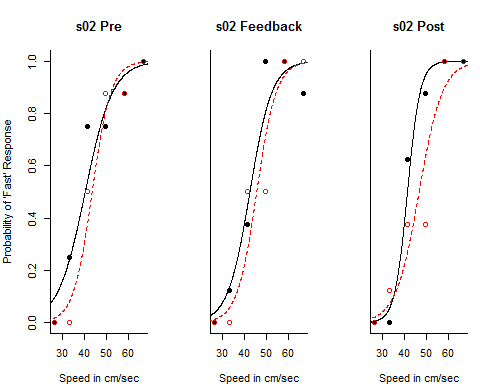


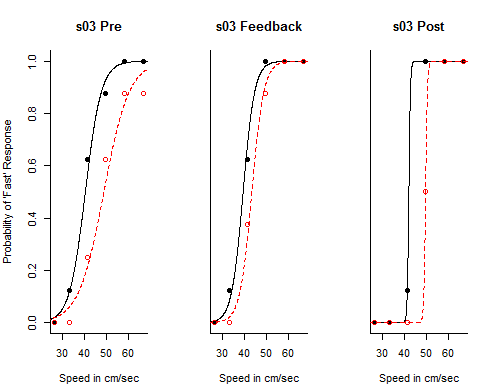

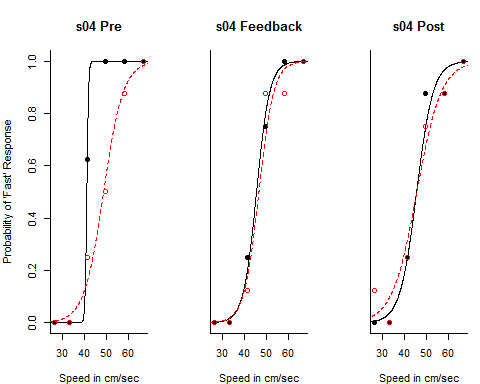


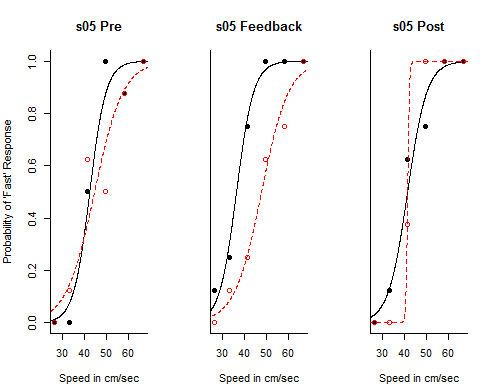

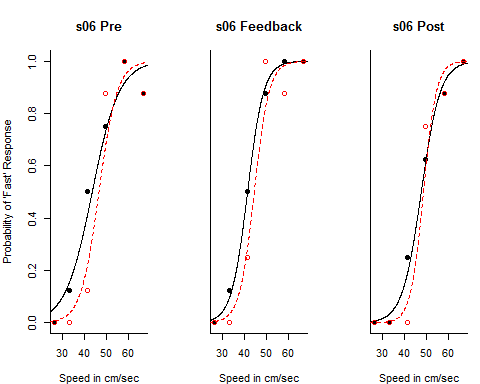


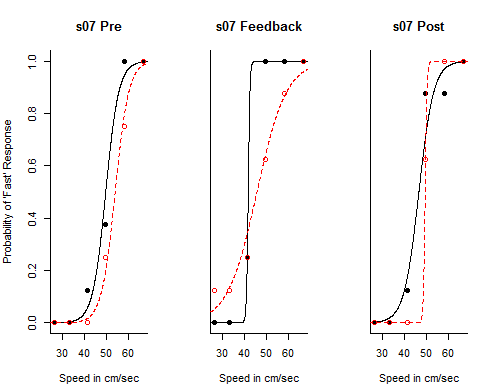


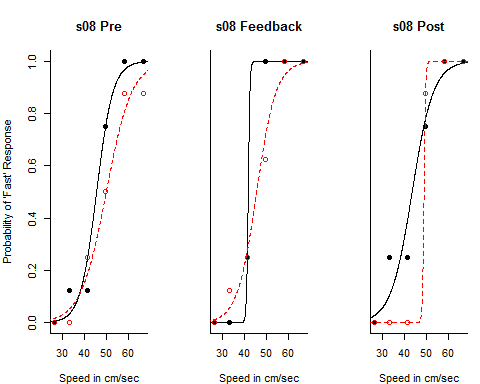

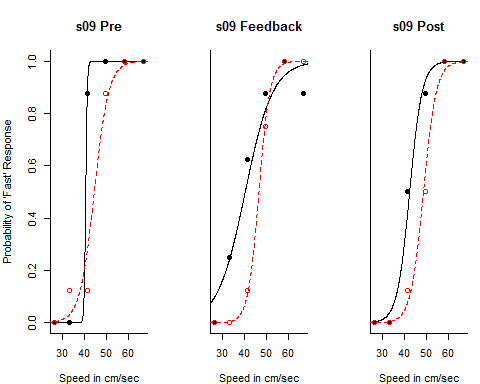

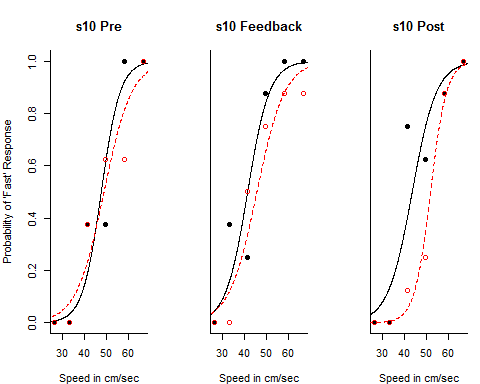

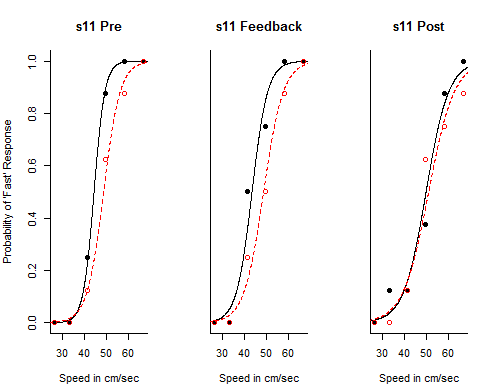


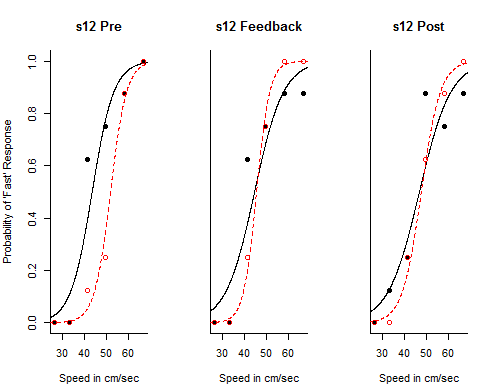

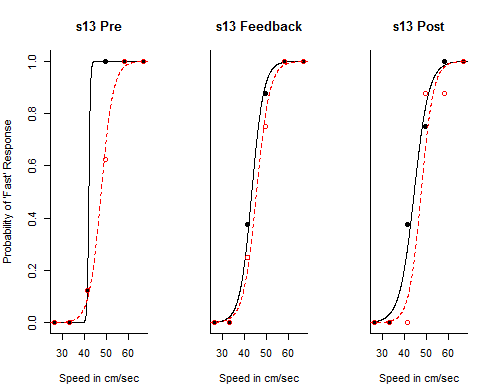

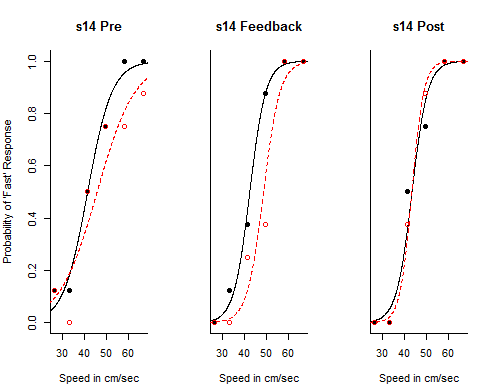


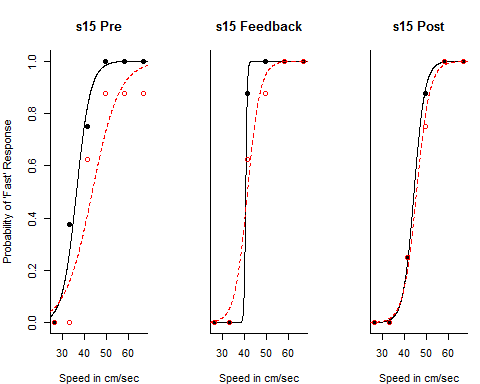

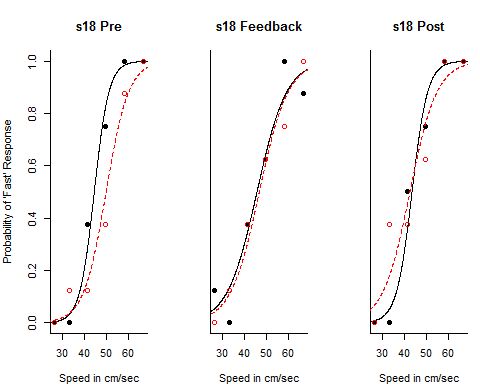

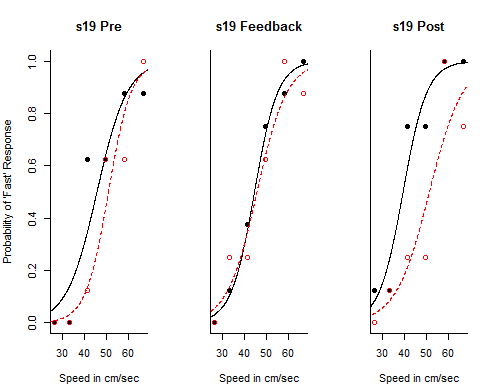

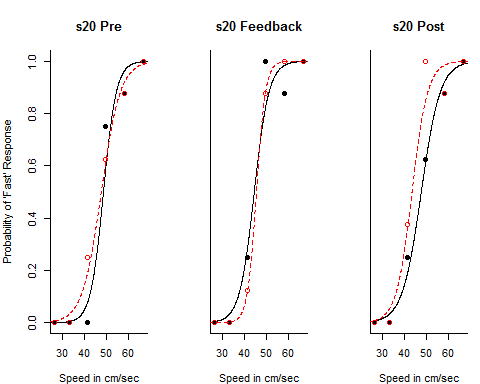

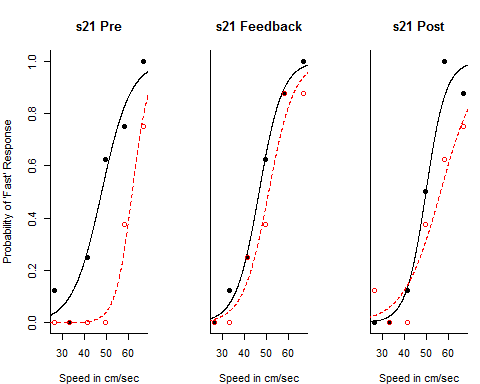

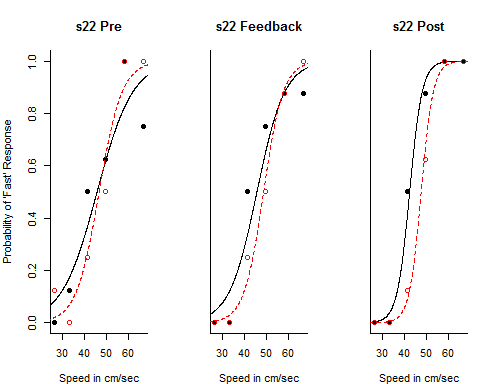


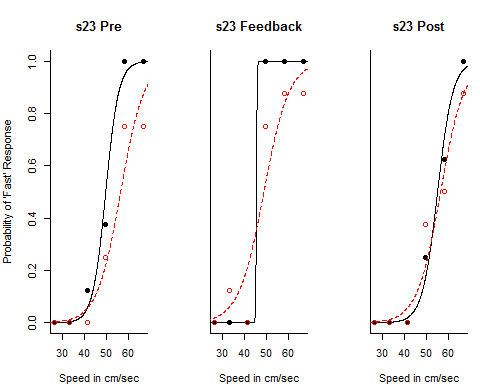

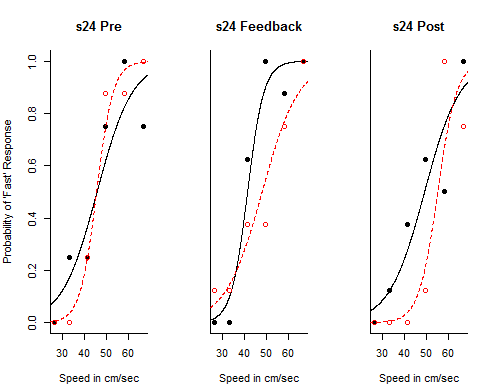


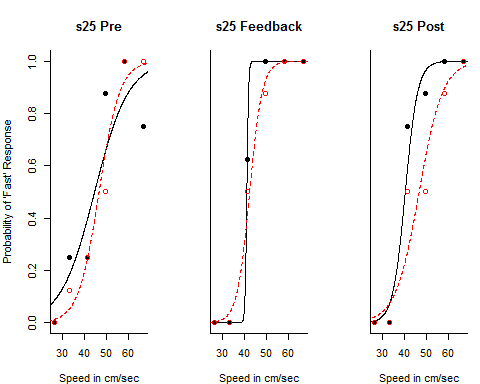

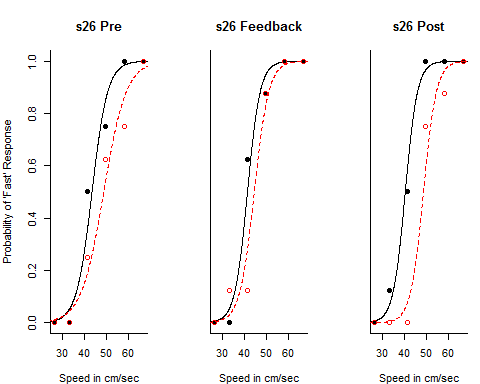


Experiment 2: each plot shows data for subject (see title of each plot) and paddle size (black = small paddle; red = big paddle). Curves represent logistic regressions.


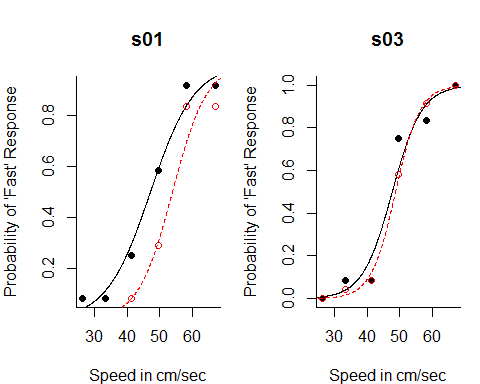

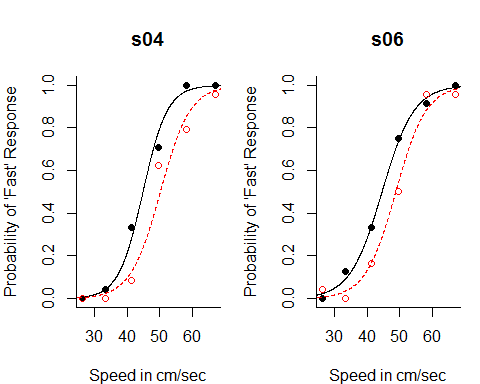

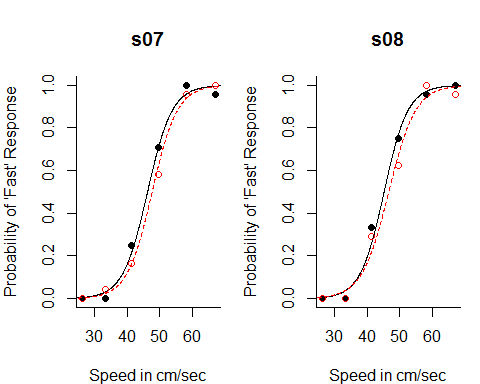

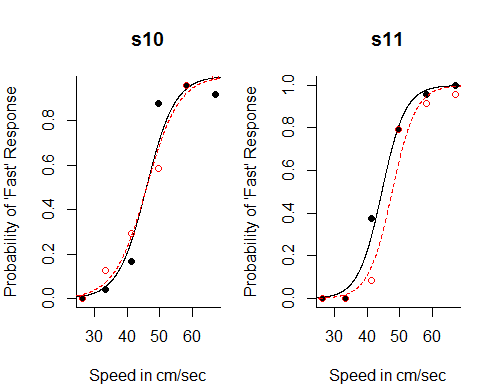

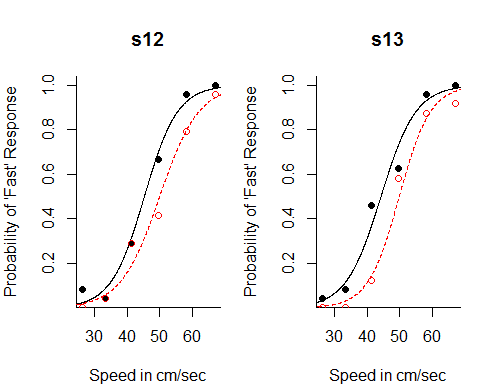

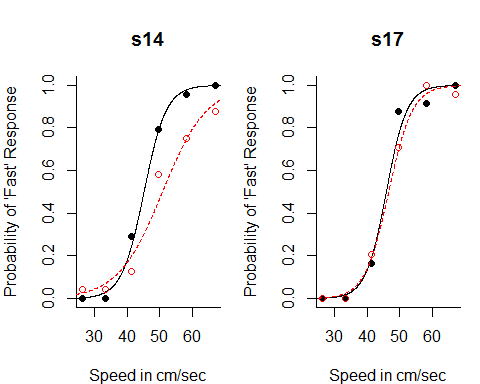

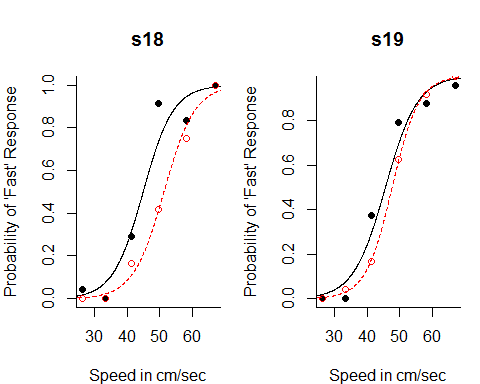

Supplement: MOESM1 [file 12105958]
